# Supplementary material for: Redox-Switchable Behavior of Transition-Metal Complexes Supported by Amino-Decorated N-Heterocyclic Carbenes
Source: MDPI journal article supplement (doi:10.3390/molecules27123776), 2022-06-11
Supplement: s1 [file s1]

# *Redox-Switchable Behavior of Transition-Metal Complexes Supported by Amino-Decorated N- Heterocyclic Carbenes*

*Mirko Ruamps, Stéphanie Bastin, Lionel Rechinat, Alix Sournia-Saquet, Laure Vendier, Noël Lugan,*

*Jean-Marie Mouesca, Dmitry A. Valyaev,\* Vincent Maurel,\* Vincent César\**

## **Supporting Information**

### **Contents**

|                                                                                                                                                                 |           |
|-----------------------------------------------------------------------------------------------------------------------------------------------------------------|-----------|
| <b>Figure S1.</b> Cyclic voltammogram of [CuCl(IMes)]                                                                                                           | <b>S2</b> |
| <b>Figure S2.</b> IR spectra of manganese NHC complexes <b>5</b> , [5](SbF <sub>6</sub> ) and [5](SbF <sub>6</sub> ) <sub>2</sub>                               | <b>S2</b> |
| <b>Figure S3.</b> UV-Vis spectra of manganese NHC complexes <b>5</b> , [5](SbF <sub>6</sub> ) and [5](SbF <sub>6</sub> ) <sub>2</sub>                           | <b>S3</b> |
| <b>Table S2.</b> Crystal data and structure refinement for [4](BF <sub>4</sub> ), <b>5</b> , [5](SbF <sub>6</sub> ) and [5](SbF <sub>6</sub> ) <sub>2</sub>     | <b>S4</b> |
| <b>Figures S4-S11.</b> NMR spectra of NHC complexes <b>2</b> , [4](BF <sub>4</sub> ), <b>5</b> , [5](SbF <sub>6</sub> ) and [5](SbF <sub>6</sub> ) <sub>2</sub> | <b>S5</b> |
| <b>Atomic coordinates of [2]<sup>+</sup>, [3]<sup>+</sup>, [4]<sup>2+</sup>, [5]<sup>+</sup>, and [5]<sup>2+</sup></b>                                          | <b>S9</b> |

**Figure S1.** Cyclic voltammogram of complex [CuCl(IMes)]. Pt working electrode, 1 mM in CH<sub>2</sub>Cl<sub>2</sub> with 0.1 M Bu<sub>4</sub>NPF<sub>6</sub> as the supporting electrolyte, 200 mV.s<sup>-1</sup> scan rate, potentials were calibrated against Fc/Fc<sup>+</sup> as internal standard with E<sub>1/2</sub> = +0.46 V vs. SCE

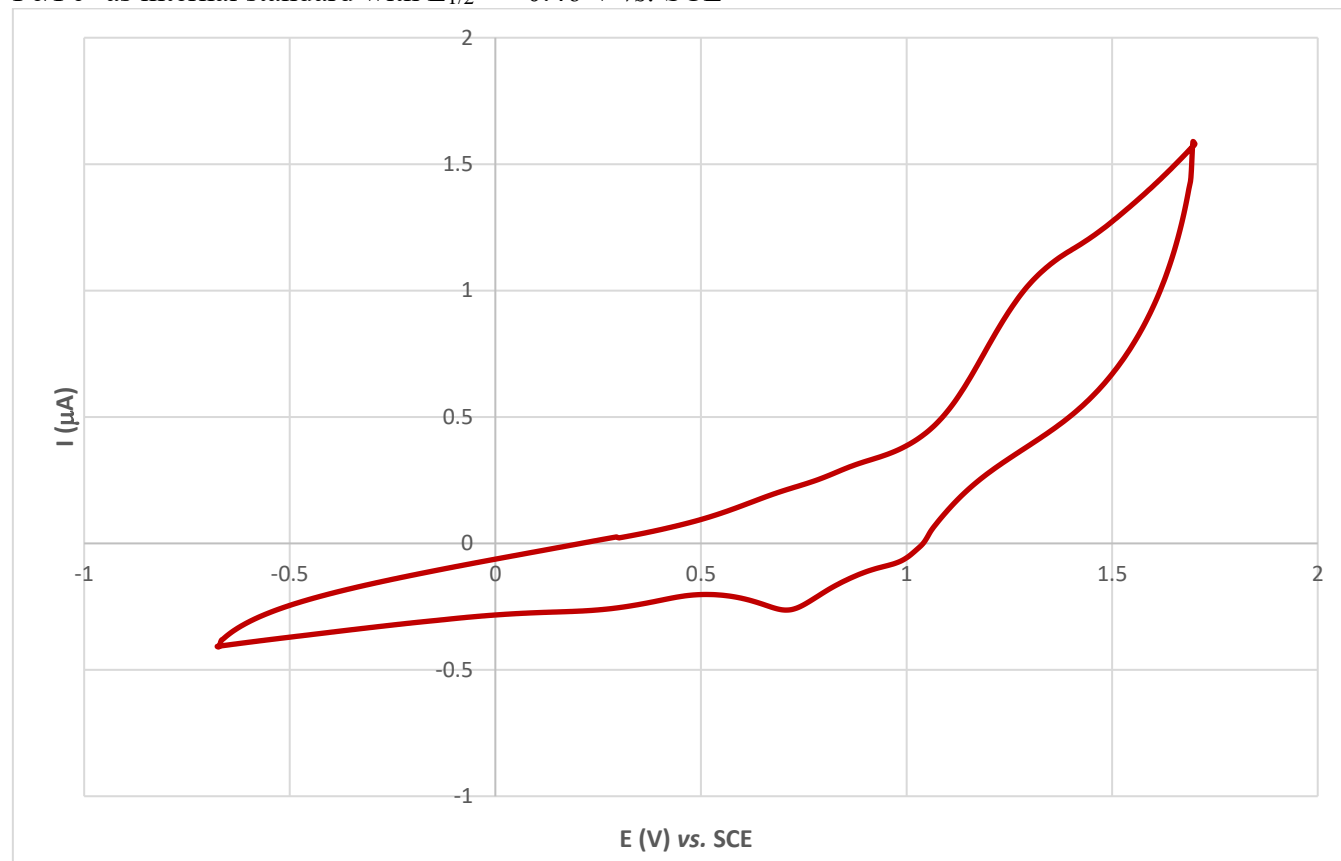

**Figure S2.** Normalized IR spectra of manganese NHC complexes **5**, [5](SbF<sub>6</sub>) and [5](SbF<sub>6</sub>)<sub>2</sub> in (CH<sub>2</sub>Cl<sub>2</sub> solution, 2200-1500 cm<sup>-1</sup> region).

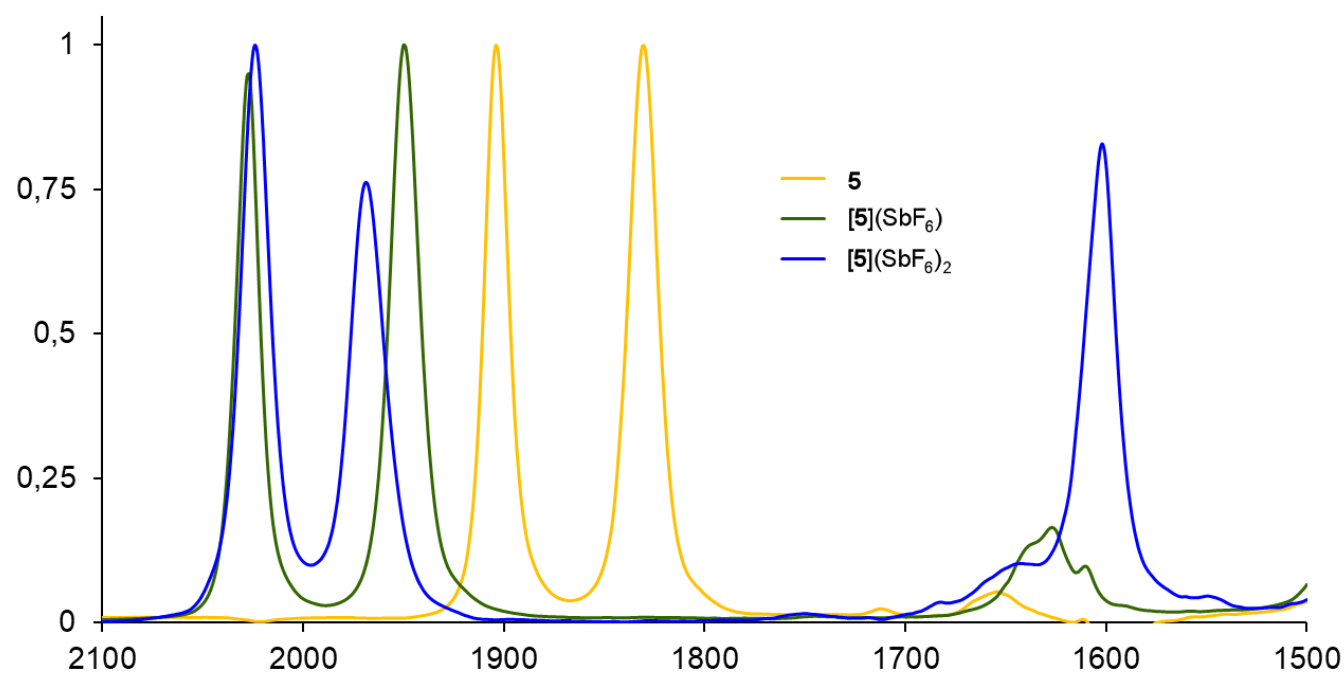

**Figure S3.** Normalized UV/Vis spectra of manganese NHC complexes **5**, **[5](SbF<sub>6</sub>)** and **[5](SbF<sub>6</sub>)<sub>2</sub>** (CH<sub>2</sub>Cl<sub>2</sub> solution, 10<sup>-4</sup> M level of concentrations).

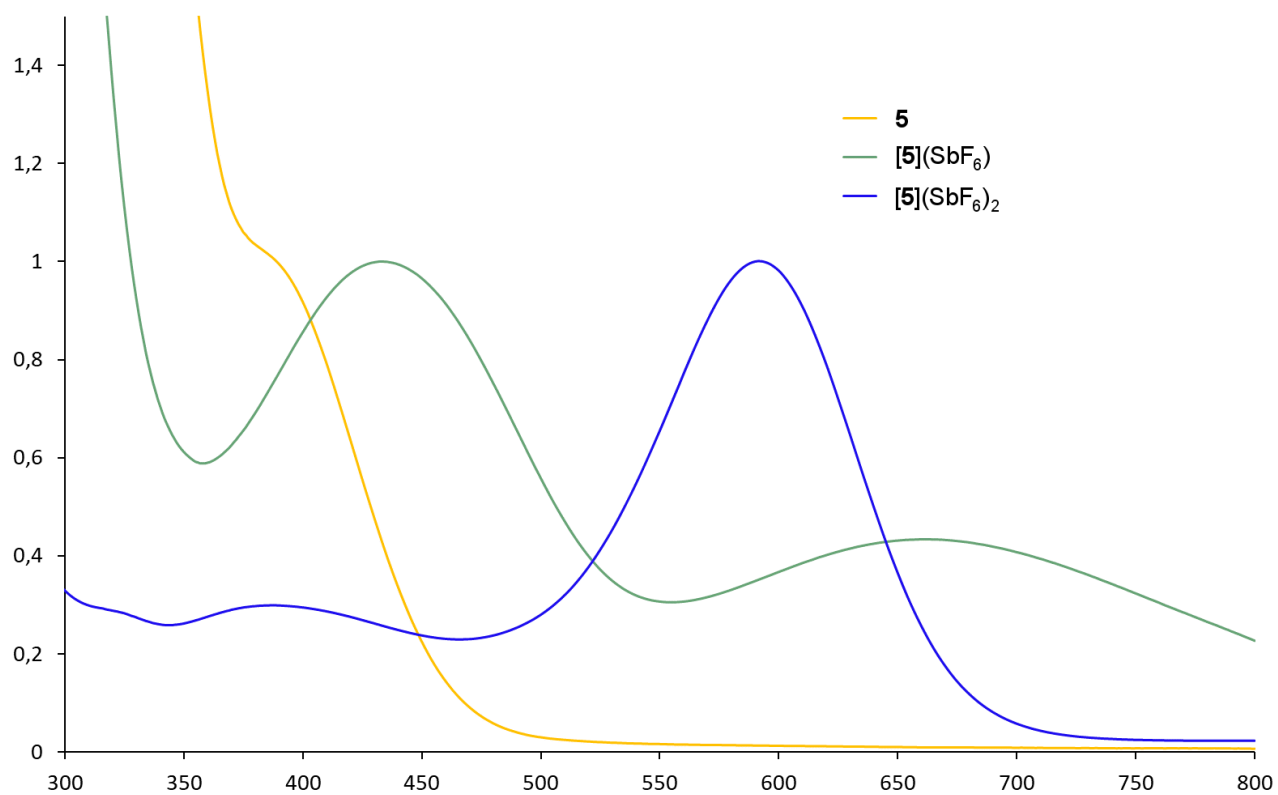

**Table S1.** Crystal data and structure refinement for NHC complexes **[4]**(BF<sub>4</sub>), **5**, **[5]**(SbF<sub>6</sub>) and **[5]**(SbF<sub>6</sub>)<sub>2</sub>

| Complex                                                   | <b>[4]</b> (BF <sub>4</sub> )                                                   | <b>5</b>                                                        | <b>[5]</b> (SbF <sub>6</sub> )                                                    | <b>[5]</b> (SbF <sub>6</sub> ) <sub>2</sub>                                                     |
|-----------------------------------------------------------|---------------------------------------------------------------------------------|-----------------------------------------------------------------|-----------------------------------------------------------------------------------|-------------------------------------------------------------------------------------------------|
| Empirical formula                                         | C <sub>12</sub> H <sub>13</sub> BF <sub>4</sub> FeN <sub>2</sub> O <sub>2</sub> | C <sub>32</sub> H <sub>39</sub> MnN <sub>4</sub> O <sub>2</sub> | C <sub>32</sub> H <sub>39</sub> F <sub>6</sub> MnN <sub>4</sub> O <sub>2</sub> Sb | C <sub>32</sub> H <sub>39</sub> F <sub>12</sub> MnN <sub>4</sub> O <sub>2</sub> Sb <sub>2</sub> |
| <i>M<sub>r</sub></i>                                      | 654.33                                                                          | 566.61                                                          | 802.36                                                                            | 1038.13                                                                                         |
| <i>T</i> /K                                               | 173                                                                             | 123                                                             | 150                                                                               | 100                                                                                             |
| $\lambda$ /Å                                              | 0.71073                                                                         | 0.71073                                                         | 1.54184                                                                           | 0.71073                                                                                         |
| Crystal system                                            | orthorhombic                                                                    | monoclinic                                                      | monoclinic                                                                        | triclinic                                                                                       |
| Space group (no.)                                         | P2 <sub>1</sub> 2 <sub>1</sub> 2 <sub>1</sub> (#19)                             | P2 <sub>1</sub> /c (#14)                                        | P2 <sub>1</sub> /n (#14)                                                          | P1 bar (#2)                                                                                     |
| <i>a</i> /Å                                               | 9.1166(3)                                                                       | 16.9220(6)                                                      | 12.95920(10)                                                                      | 8.8818(13)                                                                                      |
| <i>b</i> /Å                                               | 18.2281(5)                                                                      | 16.4516(3)                                                      | 17.97800(10)                                                                      | 16.660(2)                                                                                       |
| <i>c</i> /Å                                               | 19.4675(5)                                                                      | 21.2589(6)                                                      | 15.77180(10)                                                                      | 19.335(3)                                                                                       |
| $\alpha$ /°                                               | 90                                                                              | 90                                                              | 90                                                                                | 97.327(4)                                                                                       |
| $\beta$ /°                                                | 90                                                                              | 90.000(3)                                                       | 97.8330(10)                                                                       | 101.687(4)                                                                                      |
| $\gamma$ /°                                               | 90                                                                              | 90                                                              | 90                                                                                | 99.991(4)                                                                                       |
| <i>V</i> /Å <sup>3</sup>                                  | 3235.08(16)                                                                     | 5918.3(3)                                                       | 3640.24(4)                                                                        | 2719.7(7)                                                                                       |
| <i>Z</i>                                                  | 4                                                                               | 4                                                               | 4                                                                                 | 2                                                                                               |
| <i>D<sub>c</sub></i> /g.cm <sup>-3</sup>                  | 1.343                                                                           | 1.272                                                           | 1.464                                                                             | 1.268                                                                                           |
| $\mu$ /mm <sup>-1</sup>                                   | 0.524                                                                           | 0.481                                                           | 9.262                                                                             | 1.281                                                                                           |
| <i>F</i> (000)                                            | 1368                                                                            | 2400                                                            | 1620                                                                              | 1020                                                                                            |
| $\theta_{\max}$ /°                                        | 26.4                                                                            | 26.4                                                            | 71.4                                                                              | 26.4                                                                                            |
| Completeness                                              |                                                                                 |                                                                 |                                                                                   |                                                                                                 |
| to $\theta_{\max}$ (%)                                    | 0.997                                                                           | 0.984                                                           | 0.997                                                                             | 0.981                                                                                           |
| Index range, <i>hkl</i>                                   | -11< <i>h</i> <11<br>-22< <i>k</i> <22<br>-24< <i>l</i> <24                     | -21< <i>h</i> <20<br>-20< <i>k</i> <20<br>-26< <i>l</i> <26     | -15< <i>h</i> <15<br>-22< <i>k</i> <22<br>-19< <i>l</i> <19                       | -10< <i>h</i> <11<br>-20< <i>k</i> <20<br>-24< <i>l</i> <24                                     |
| Reflections                                               |                                                                                 |                                                                 |                                                                                   |                                                                                                 |
| collected                                                 | 6600                                                                            | 11898                                                           | 7059                                                                              | 38907                                                                                           |
| Independent                                               |                                                                                 |                                                                 |                                                                                   |                                                                                                 |
| reflections                                               | 6172                                                                            | 10775                                                           | 6497                                                                              | 10900                                                                                           |
| Parameters                                                | 407                                                                             | 724                                                             | 425                                                                               | 491                                                                                             |
| <i>GOF</i>                                                | 1.03                                                                            | 1.03                                                            | 1.04                                                                              | 1.11                                                                                            |
| <i>R</i> (all data)                                       | 0.0328                                                                          | 0.0392                                                          | 0.027                                                                             | 0.1413                                                                                          |
| <i>R</i> [ <i>I</i> >2 $\sigma$ ( <i>I</i> )]             | 0.0289                                                                          | 0.0328                                                          | 0.024                                                                             | 0.1191                                                                                          |
| <i>R<sub>w</sub></i> (all data)                           | 0.0845                                                                          | 0.0845                                                          | 0.063                                                                             | 0.26                                                                                            |
| <i>R<sub>w</sub></i> [ <i>I</i> >2 $\sigma$ ( <i>I</i> )] | 0.0813                                                                          | 0.0803                                                          | 0.0612                                                                            | 0.2484                                                                                          |
| $\Delta\rho_{\max/\min}$ /e.Å <sup>-3</sup>               | -0.16/0.44                                                                      | -0.38/0.30                                                      | -0.61/0.44                                                                        | -2.20/1.38                                                                                      |

## NMR Spectra

**Figure S4.**  $^1\text{H}$  NMR spectrum of **2** (400 MHz,  $\text{CDCl}_3$ )

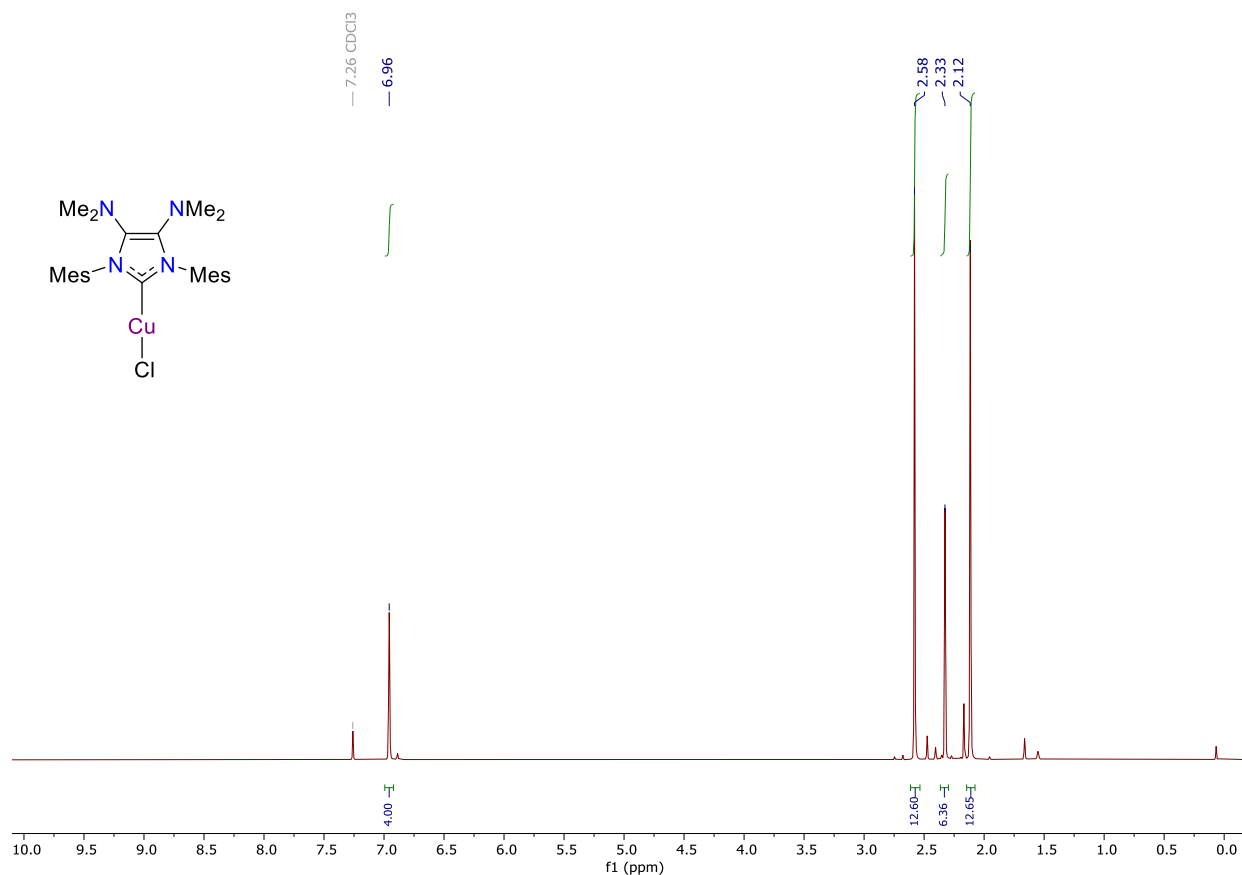

**Figure S5.**  $^{13}\text{C}\{^1\text{H}\}$  NMR spectrum of **2** (100.6 MHz,  $\text{CDCl}_3$ )

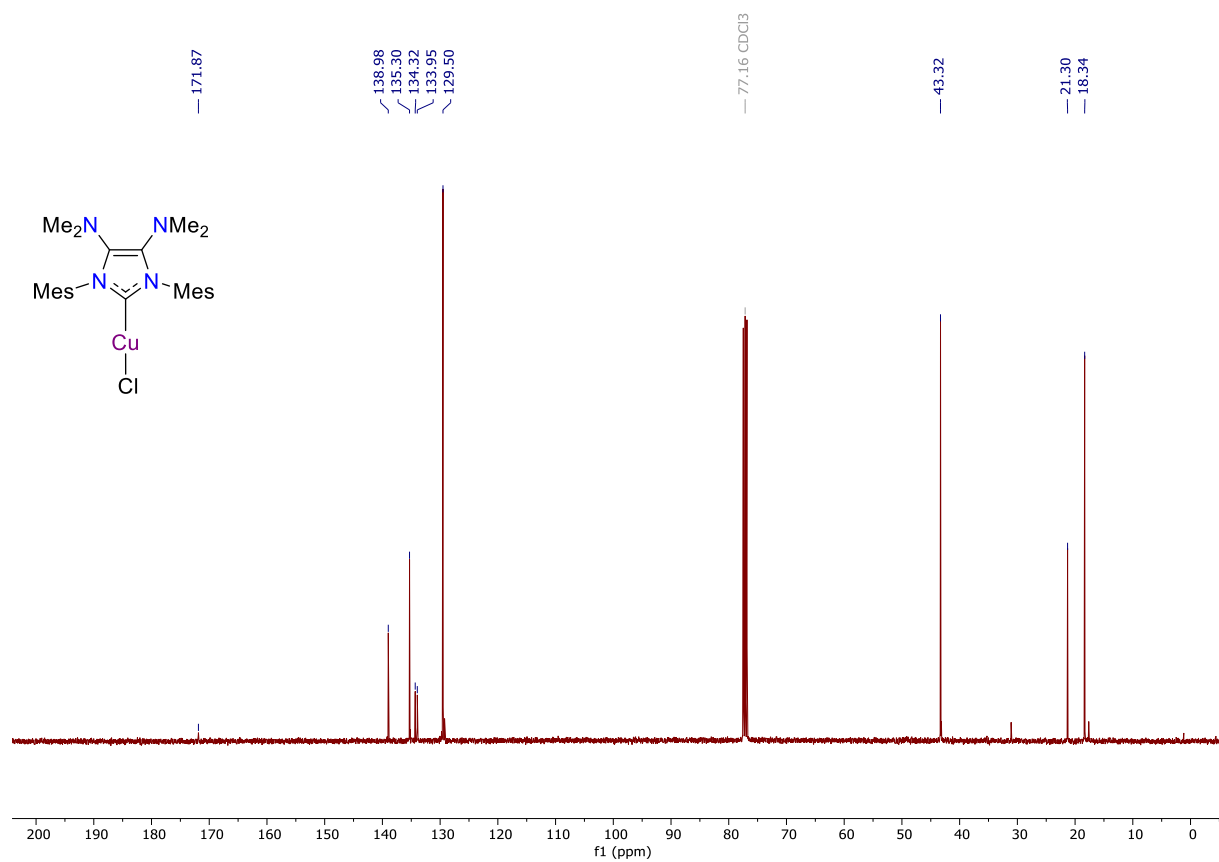

**Figure S6.**  $^1\text{H}$  NMR spectrum of **[4]**( $\text{BF}_4$ ) (400 MHz,  $\text{CDCl}_3$ )

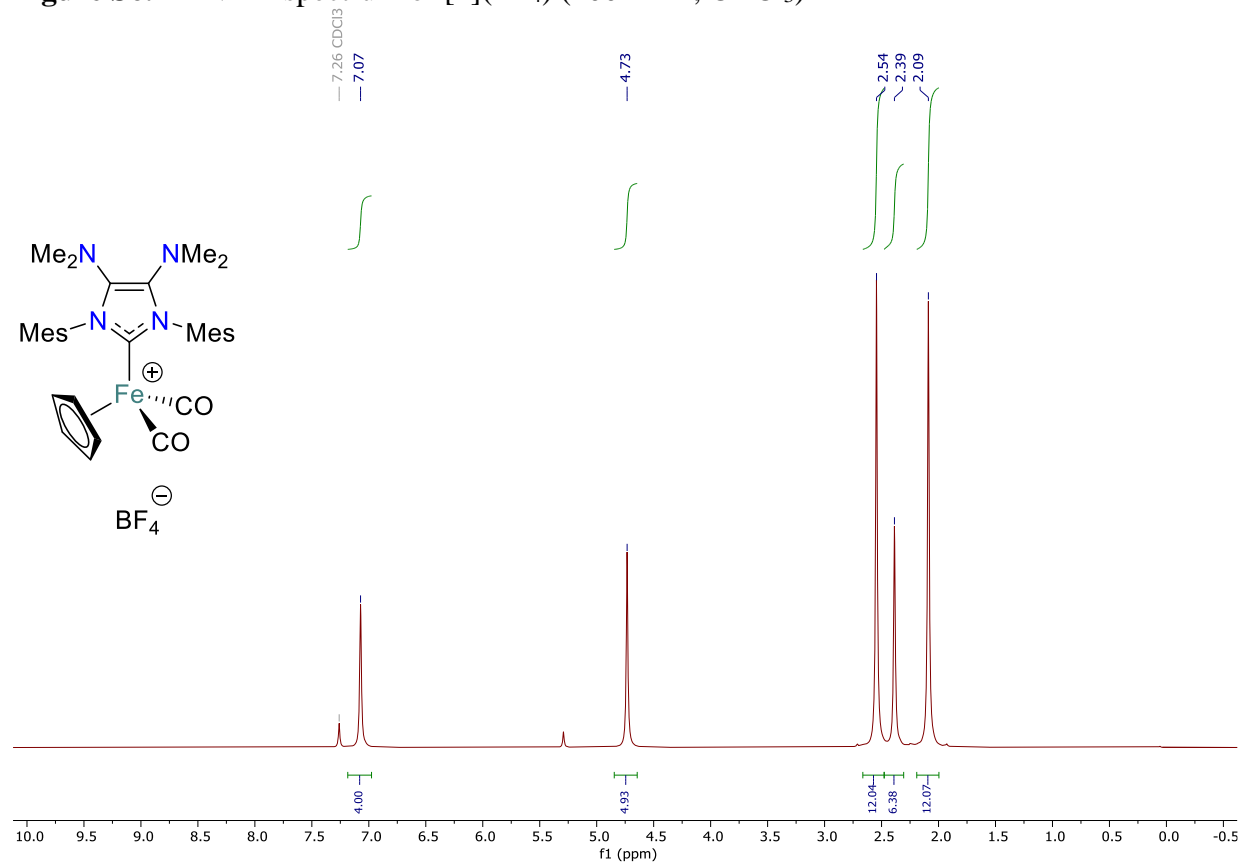

**Figure S7.**  $^{13}\text{C}\{^1\text{H}\}$  NMR spectrum of **[4]**( $\text{BF}_4$ ) (100.6 MHz,  $\text{CDCl}_3$ )

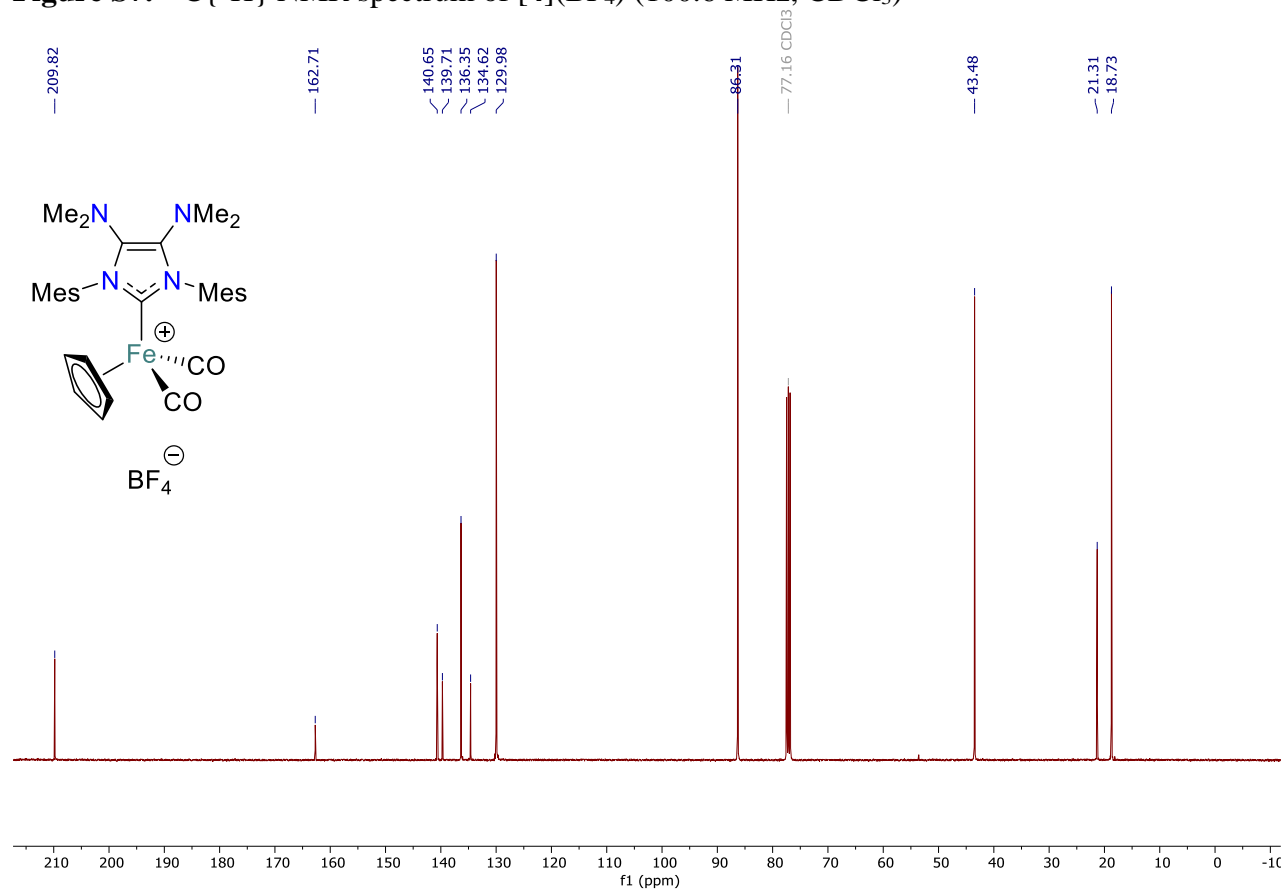

**Figure S8.**  $^1\text{H}$  NMR spectrum of **5** (400 MHz,  $\text{C}_6\text{D}_6$ )

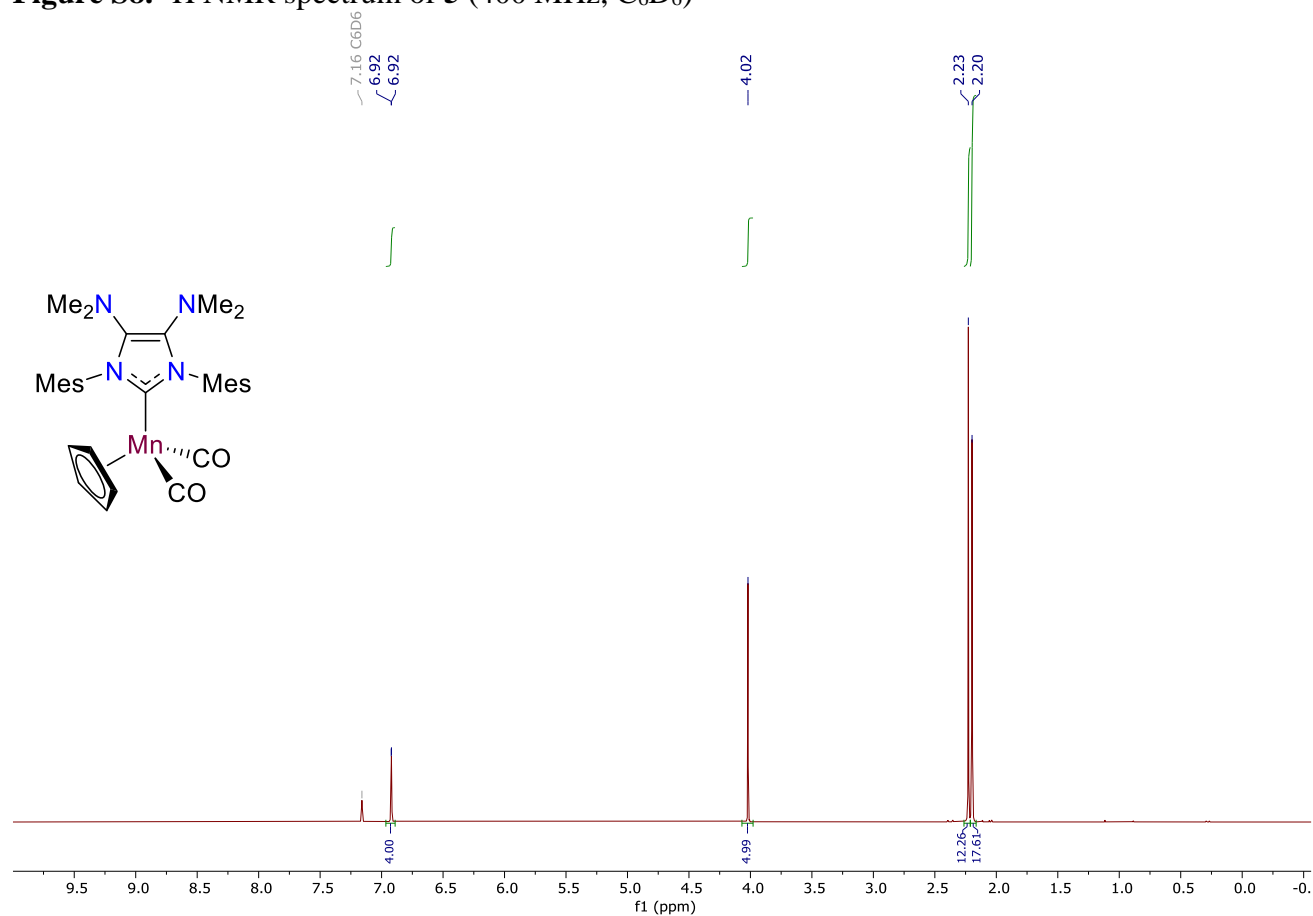

**Figure S9.**  $^{13}\text{C}\{^1\text{H}\}$  spectrum (JMOD) of **5** (400 MHz,  $\text{C}_6\text{D}_6$ )

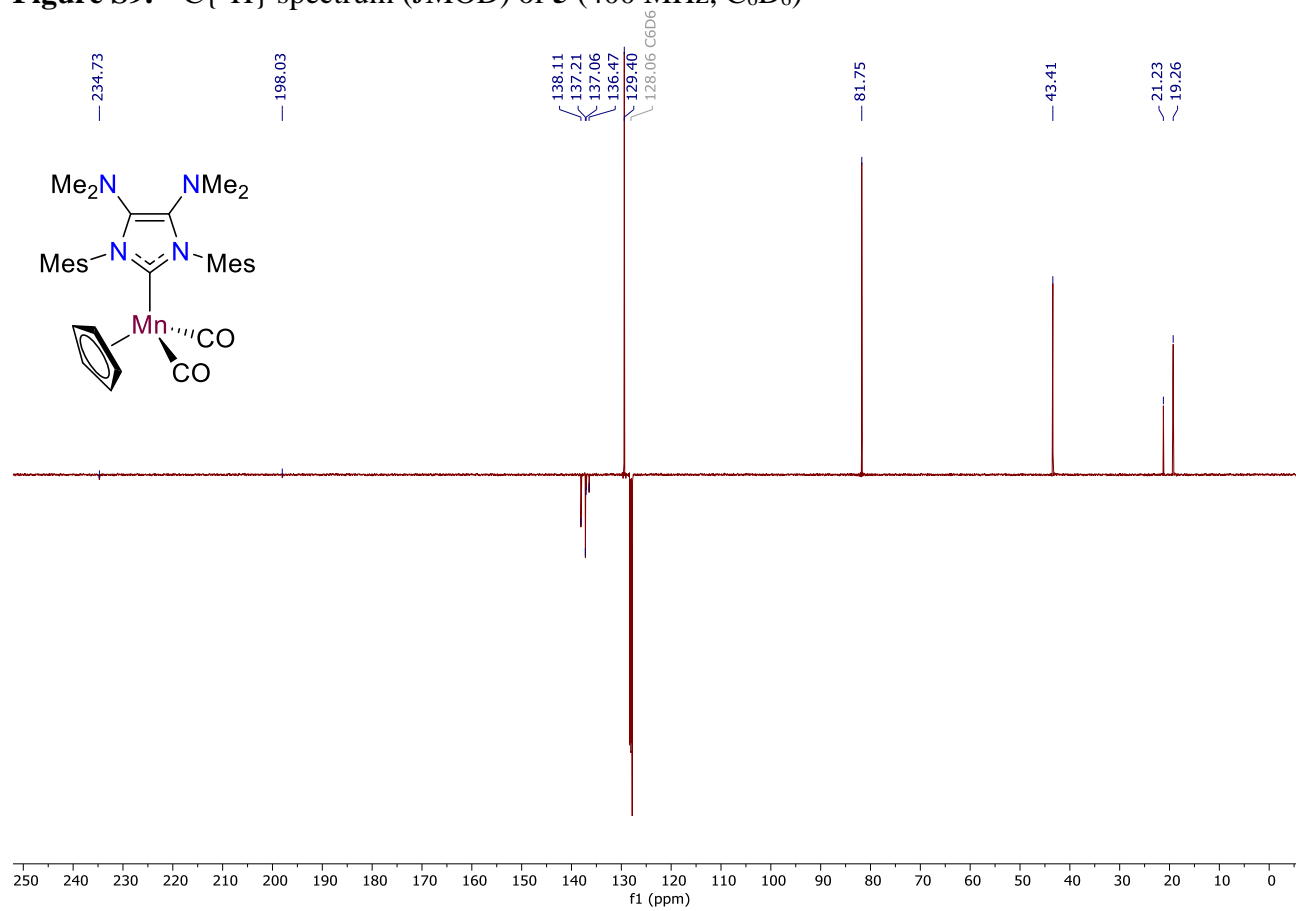

**Figure S10.**  $^1\text{H}$  NMR spectrum of  $[\mathbf{5}](\text{SbF}_6)$  (400 MHz,  $\text{CD}_2\text{Cl}_2$ ), signals of  $\text{Et}_2\text{O}$  are marked with asterisk

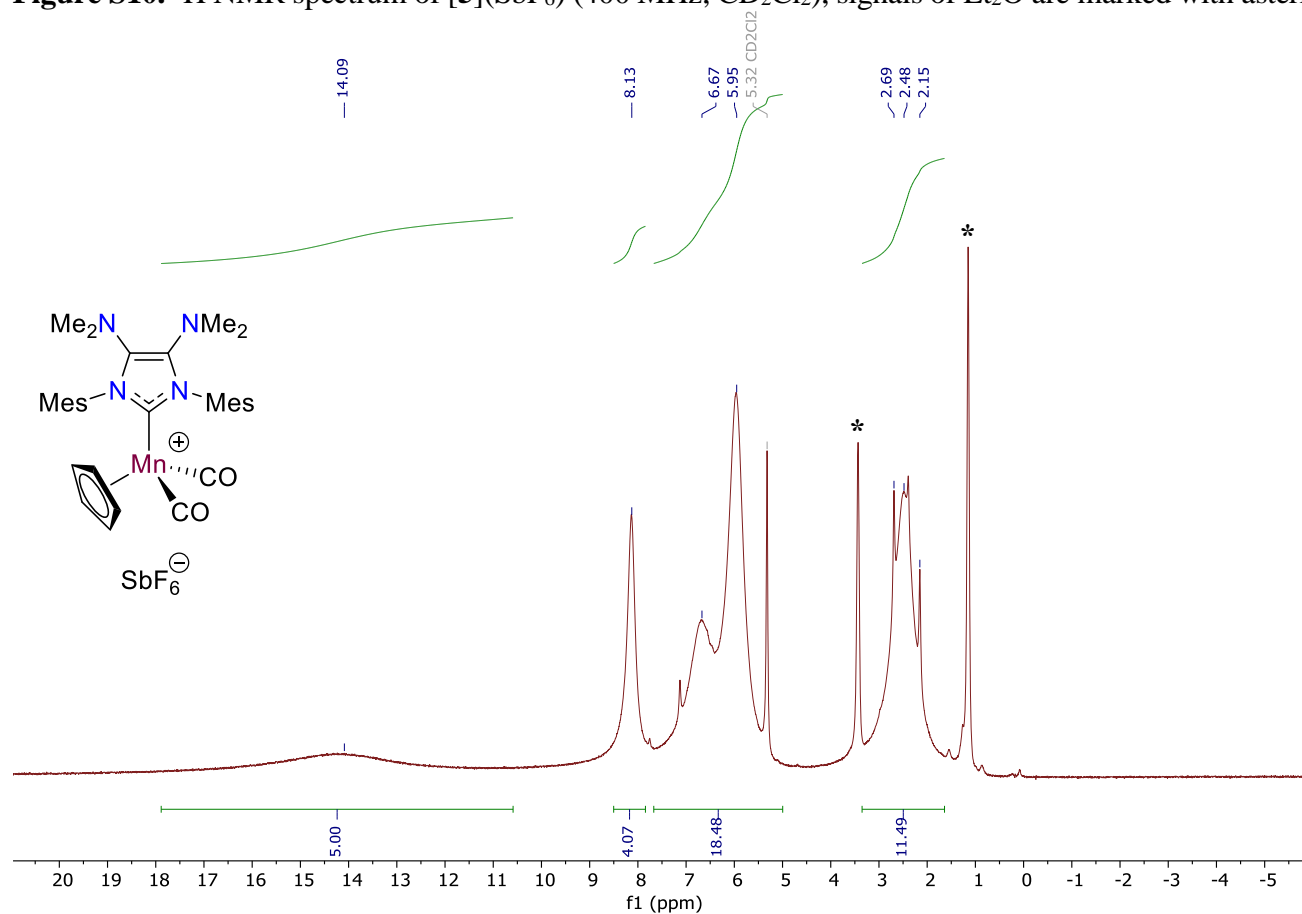

**Figure S11.**  $^1\text{H}$  NMR spectrum of  $[\mathbf{5}](\text{SbF}_6)_2$  (400 MHz,  $\text{CD}_2\text{Cl}_2$ ), signals of grease is marked with asterisk

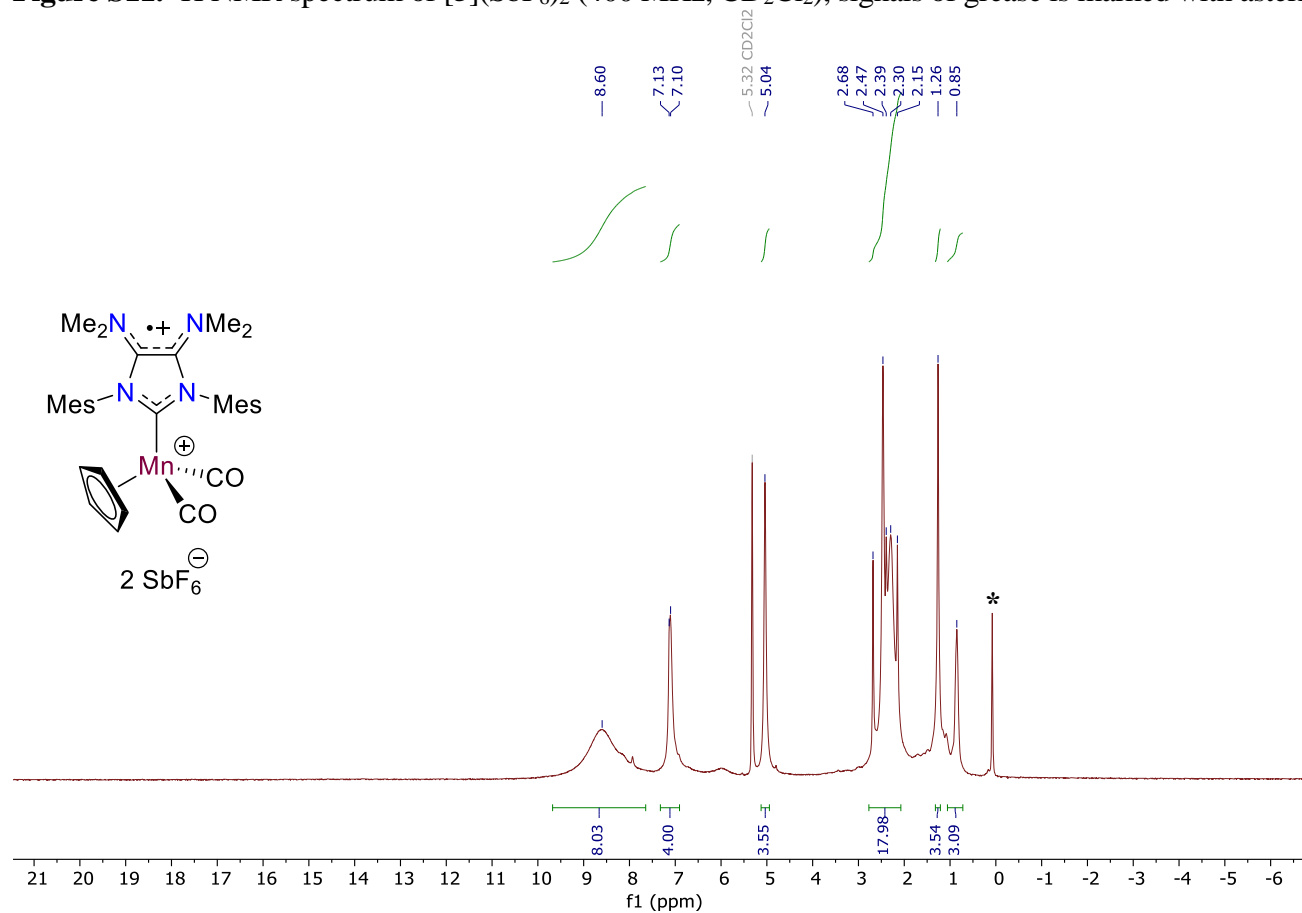



## DFT-optimized geometries

All DFT calculations were performed with the ADF (Amsterdam Density Functional) code developed by E. J. Baerends and co-workers<sup>[1]</sup> using triple-zeta (TZ2P) basis sets (no frozen core) (relativistic ZORA/TZ2P for Rhodium). Geometry optimizations were performed *in vacuo* relying on the Generalized Gradient Approximation (GGA) VBP exchange-correlation (XC) potential (VWN + BP: Vosko, Wilk & Nusair<sup>[2]</sup> + corrective terms by Becke<sup>[3]</sup> for the exchange, and Perdew<sup>[4]</sup> for the correlation) with ADF grid precision 6 throughout.

- [1] G. te Velde, E. J. Baerends, J. Comput. Phys. 1992, 99, 84–98.
- [2] S. H. Vosko, L. Wilk, M. Nusair, Can. J. Phys. 1980, 58, 1200–1211.
- [3] A. D. Becke, Phys. Rev. A 1988, 38, 3098–3100.
- [4] J. P. Perdew, Phys. Rev. B 1986, 33, 8822–8824.

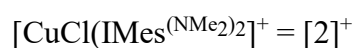

|    |           |           |           |
|----|-----------|-----------|-----------|
| Cu | 3.900422  | 4.642614  | 11.055449 |
| C  | 3.982565  | 3.073204  | 12.057146 |
| C  | 4.774003  | 1.186874  | 13.071428 |
| C  | 3.379379  | 1.301622  | 13.365282 |
| C  | 5.597912  | -0.204438 | 14.927148 |
| H  | 6.512358  | 0.118227  | 15.448680 |
| H  | 5.548225  | -1.301127 | 14.969302 |
| H  | 4.733403  | 0.221405  | 15.442415 |
| C  | 6.850419  | -0.160728 | 12.803148 |
| H  | 6.724217  | -0.001179 | 11.729689 |
| H  | 6.999206  | -1.234191 | 12.987015 |
| H  | 7.746029  | 0.380267  | 13.144055 |
| C  | 2.745096  | -1.023175 | 13.866226 |
| H  | 3.600012  | -1.245370 | 13.222825 |
| H  | 1.835043  | -1.422640 | 13.392280 |
| H  | 2.874313  | -1.523238 | 14.835854 |
| C  | 1.396797  | 0.821793  | 14.793358 |
| H  | 0.481008  | 0.677291  | 14.200478 |
| H  | 1.460832  | 1.867951  | 15.101757 |
| H  | 1.335375  | 0.190498  | 15.691110 |
| C  | 6.382494  | 2.641086  | 11.724858 |
| C  | 7.274426  | 3.323089  | 12.570540 |
| C  | 8.510041  | 3.701207  | 12.035575 |
| H  | 9.209324  | 4.243081  | 12.674227 |
| C  | 8.862588  | 3.431227  | 10.707898 |
| C  | 7.931810  | 2.767955  | 9.899943  |
| H  | 8.177202  | 2.568178  | 8.855810  |
| C  | 6.681083  | 2.365413  | 10.379700 |
| C  | 6.915146  | 3.688880  | 13.988495 |
| H  | 7.722336  | 4.265587  | 14.452236 |
| H  | 6.736561  | 2.804124  | 14.617119 |
| H  | 6.003143  | 4.302048  | 14.020858 |
| C  | 10.208120 | 3.840080  | 10.165742 |
| H  | 10.945373 | 3.035913  | 10.309002 |
| H  | 10.591713 | 4.730849  | 10.676932 |
| H  | 10.159326 | 4.052121  | 9.091289  |
| C  | 5.693554  | 1.696430  | 9.457631  |
| H  | 4.878148  | 2.385945  | 9.192397  |
| H  | 5.228658  | 0.808456  | 9.908816  |

|    |           |          |           |
|----|-----------|----------|-----------|
| H  | 6.182354  | 1.387410 | 8.527603  |
| C  | 1.608330  | 3.016186 | 12.703121 |
| C  | 1.269503  | 4.087735 | 13.544978 |
| C  | -0.029760 | 4.599686 | 13.448524 |
| H  | -0.308668 | 5.435657 | 14.091442 |
| C  | -0.968057 | 4.087027 | 12.547090 |
| C  | -0.575482 | 3.030664 | 11.714444 |
| H  | -1.283411 | 2.633488 | 10.985060 |
| C  | 0.707380  | 2.478844 | 11.766034 |
| C  | 2.259350  | 4.705066 | 14.499908 |
| H  | 2.804822  | 3.953295 | 15.087771 |
| H  | 1.752529  | 5.378978 | 15.198705 |
| H  | 3.011867  | 5.294458 | 13.954980 |
| C  | -2.362519 | 4.652995 | 12.464956 |
| H  | -3.092115 | 3.961166 | 12.910747 |
| H  | -2.663890 | 4.812189 | 11.421704 |
| H  | -2.440981 | 5.608780 | 12.994584 |
| C  | 1.105243  | 1.384976 | 10.807522 |
| H  | 0.270541  | 1.132545 | 10.145121 |
| H  | 1.409386  | 0.463308 | 11.324768 |
| H  | 1.949913  | 1.699496 | 10.177676 |
| N  | 5.078298  | 2.263702 | 12.244706 |
| N  | 2.958931  | 2.481169 | 12.758906 |
| N  | 5.649890  | 0.254625 | 13.534778 |
| N  | 2.596638  | 0.424708 | 14.050497 |
| Cl | 3.807782  | 6.388941 | 9.933897  |

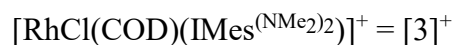

|    |          |           |           |
|----|----------|-----------|-----------|
| Rh | 3.909596 | 4.862127  | 10.937715 |
| C  | 5.495943 | 5.694861  | 11.737335 |
| O  | 6.341381 | 6.350589  | 12.143054 |
| C  | 2.262823 | 4.458257  | 9.954440  |
| O  | 1.352228 | 4.381450  | 9.265321  |
| C  | 3.981625 | 3.140479  | 12.011865 |
| C  | 4.770683 | 1.252901  | 13.056176 |
| C  | 3.365807 | 1.309734  | 13.254769 |
| C  | 5.548848 | -0.171074 | 14.907564 |
| H  | 6.459290 | 0.111744  | 15.459270 |
| H  | 5.467757 | -1.267253 | 14.927009 |
| H  | 4.685005 | 0.267128  | 15.414158 |
| C  | 6.832141 | -0.129486 | 12.801481 |
| H  | 6.728671 | 0.068691  | 11.731601 |
| H  | 6.928628 | -1.215175 | 12.949613 |
| H  | 7.749674 | 0.355499  | 13.168720 |
| C  | 2.762374 | -1.031144 | 13.720435 |
| H  | 3.614069 | -1.228079 | 13.064120 |
| H  | 1.857867 | -1.457079 | 13.258108 |
| H  | 2.919003 | -1.534793 | 14.684987 |
| C  | 1.393957 | 0.778613  | 14.688325 |
| H  | 0.461600 | 0.608398  | 14.128219 |
| H  | 1.440460 | 1.827669  | 14.991540 |
| H  | 1.376577 | 0.152500  | 15.592548 |
| C  | 6.446628 | 2.735213  | 11.900778 |
| C  | 7.319125 | 3.250564  | 12.874740 |
| C  | 8.625801 | 3.559517  | 12.477483 |
| H  | 9.311429 | 3.972075  | 13.219112 |

|    |           |          |           |
|----|-----------|----------|-----------|
| C  | 9.069826  | 3.373698 | 11.164834 |
| C  | 8.161027  | 2.864881 | 10.226898 |
| H  | 8.484290  | 2.718705 | 9.194887  |
| C  | 6.845416  | 2.538500 | 10.564497 |
| C  | 6.886190  | 3.504158 | 14.297342 |
| H  | 7.602190  | 4.161064 | 14.802829 |
| H  | 6.826721  | 2.574096 | 14.881828 |
| H  | 5.898322  | 3.981822 | 14.345902 |
| C  | 10.474524 | 3.735001 | 10.756020 |
| H  | 10.942889 | 2.924797 | 10.181859 |
| H  | 11.105705 | 3.950741 | 11.625182 |
| H  | 10.472855 | 4.626550 | 10.112539 |
| C  | 5.902020  | 2.011889 | 9.514580  |
| H  | 5.157890  | 2.778240 | 9.248250  |
| H  | 5.344621  | 1.128514 | 9.857364  |
| H  | 6.447456  | 1.738590 | 8.605201  |
| C  | 1.546135  | 2.887437 | 12.522621 |
| C  | 1.101785  | 3.962031 | 13.316281 |
| C  | -0.248091 | 4.313472 | 13.233093 |
| H  | -0.607402 | 5.144288 | 13.842499 |
| C  | -1.146435 | 3.638437 | 12.396191 |
| C  | -0.656965 | 2.582750 | 11.620202 |
| H  | -1.335456 | 2.055620 | 10.947716 |
| C  | 0.684763  | 2.186219 | 11.660563 |
| C  | 2.031243  | 4.731087 | 14.218272 |
| H  | 2.656372  | 4.070924 | 14.836392 |
| H  | 1.466462  | 5.389174 | 14.886871 |
| H  | 2.714409  | 5.355114 | 13.621914 |
| C  | -2.588757 | 4.065901 | 12.309274 |
| H  | -3.221570 | 3.271730 | 11.897052 |
| H  | -2.689998 | 4.944094 | 11.654576 |
| H  | -2.982998 | 4.349004 | 13.293165 |
| C  | 1.164368  | 1.064667 | 10.772954 |
| H  | 0.433865  | 0.865600 | 9.981410  |
| H  | 1.303765  | 0.127421 | 11.331897 |
| H  | 2.123569  | 1.303284 | 10.294063 |
| N  | 5.099111  | 2.373455 | 12.294071 |
| N  | 2.931040  | 2.469585 | 12.614210 |
| N  | 5.643294  | 0.318490 | 13.530254 |
| N  | 2.578732  | 0.409651 | 13.910318 |
| Cl | 3.834763  | 6.854779 | 9.690506  |

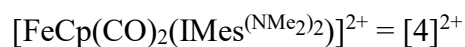

|    |           |          |           |
|----|-----------|----------|-----------|
| Fe | 11.650658 | 4.347856 | 6.015645  |
| C  | 10.485754 | 3.228739 | 5.283479  |
| C  | 10.791642 | 5.731090 | 5.301255  |
| C  | 9.885196  | 3.847308 | 9.830887  |
| C  | 9.977707  | 5.269858 | 9.791691  |
| C  | 9.900098  | 3.476751 | 12.263819 |
| H  | 10.487689 | 4.397564 | 12.266036 |
| H  | 10.503063 | 2.670318 | 12.706030 |
| H  | 9.000545  | 3.603829 | 12.880637 |
| C  | 8.930997  | 1.743201 | 10.817967 |
| H  | 8.238735  | 1.654775 | 11.665976 |
| H  | 9.686211  | 0.948251 | 10.901259 |
| H  | 8.371725  | 1.618362 | 9.889944  |

|   |           |           |           |
|---|-----------|-----------|-----------|
| C | 10.025014 | 7.481309  | 10.975194 |
| H | 9.863026  | 7.677519  | 12.043592 |
| H | 9.517836  | 8.265932  | 10.395190 |
| H | 11.096384 | 7.510106  | 10.769291 |
| C | 8.189805  | 5.888867  | 11.364235 |
| H | 7.743884  | 4.955114  | 11.013870 |
| H | 7.504916  | 6.717092  | 11.130304 |
| H | 8.322768  | 5.857282  | 12.453746 |
| C | 13.624887 | 4.204538  | 6.873931  |
| H | 13.864671 | 4.260658  | 7.928854  |
| C | 13.323679 | 3.011379  | 6.152076  |
| H | 13.296946 | 2.002126  | 6.546402  |
| C | 13.101594 | 3.381851  | 4.785286  |
| H | 12.867256 | 2.703534  | 3.971042  |
| C | 13.247584 | 4.791020  | 4.676104  |
| H | 13.146618 | 5.371913  | 3.765054  |
| C | 13.571148 | 5.306973  | 5.976901  |
| H | 13.760099 | 6.347815  | 6.213244  |
| C | 10.410232 | 1.991762  | 8.218347  |
| C | 11.531415 | 1.235410  | 8.612940  |
| C | 11.561096 | -0.116125 | 8.254347  |
| H | 12.427976 | -0.713273 | 8.544370  |
| C | 10.515453 | -0.727834 | 7.548421  |
| C | 9.408798  | 0.057430  | 7.207342  |
| H | 8.579768  | -0.399171 | 6.664680  |
| C | 9.322042  | 1.415147  | 7.537046  |
| C | 12.658964 | 1.798870  | 9.444915  |
| H | 12.541203 | 1.517262  | 10.501882 |
| H | 12.717059 | 2.891686  | 9.402749  |
| H | 13.625857 | 1.391285  | 9.125936  |
| C | 10.574136 | -2.190951 | 7.197165  |
| H | 9.832299  | -2.454826 | 6.435932  |
| H | 10.374678 | -2.808907 | 8.084948  |
| H | 11.567485 | -2.474071 | 6.827231  |
| C | 8.060990  | 2.174806  | 7.202563  |
| H | 7.638790  | 1.822744  | 6.255152  |
| H | 8.218121  | 3.256046  | 7.121017  |
| H | 7.286915  | 2.012677  | 7.969005  |
| C | 10.827529 | 6.951713  | 8.135470  |
| C | 12.072418 | 7.566378  | 8.361593  |
| C | 12.227687 | 8.894080  | 7.944376  |
| H | 13.187007 | 9.385877  | 8.116761  |
| C | 11.189399 | 9.616680  | 7.345266  |
| C | 9.956771  | 8.972313  | 7.172995  |
| H | 9.130101  | 9.519147  | 6.716998  |
| C | 9.744357  | 7.646137  | 7.558934  |
| C | 13.208162 | 6.900376  | 9.102602  |
| H | 13.418881 | 7.432357  | 10.041614 |
| H | 14.140647 | 6.934699  | 8.524915  |
| H | 12.999710 | 5.856045  | 9.355166  |
| C | 11.390169 | 11.036831 | 6.888080  |
| H | 11.666683 | 11.060753 | 5.823384  |
| H | 12.192238 | 11.532619 | 7.446329  |
| H | 10.472855 | 11.627379 | 6.996154  |
| C | 8.384373  | 7.022011  | 7.363062  |
| H | 7.828062  | 7.552903  | 6.583349  |

|   |           |          |           |
|---|-----------|----------|-----------|
| H | 7.780109  | 7.076745 | 8.281478  |
| H | 8.441325  | 5.965603 | 7.071453  |
| C | 10.816155 | 4.447482 | 7.814034  |
| N | 10.342850 | 3.398143 | 8.587003  |
| N | 10.608449 | 5.583331 | 8.582935  |
| N | 9.540421  | 3.079341 | 10.893632 |
| N | 9.471216  | 6.149390 | 10.690285 |
| O | 9.796314  | 2.557183 | 4.649799  |
| O | 10.283586 | 6.561407 | 4.685973  |

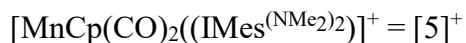

|    |           |           |           |
|----|-----------|-----------|-----------|
| Mn | 11.594456 | 4.337599  | 5.928137  |
| C  | 11.406497 | 2.576236  | 5.593136  |
| C  | 9.966949  | 4.519418  | 5.199679  |
| C  | 9.747850  | 3.910667  | 9.755246  |
| C  | 9.923400  | 5.293109  | 9.750350  |
| C  | 9.774202  | 3.380886  | 12.146061 |
| H  | 10.687973 | 3.983838  | 12.133391 |
| H  | 9.991352  | 2.431121  | 12.657812 |
| H  | 9.003625  | 3.906929  | 12.735958 |
| C  | 8.162994  | 2.225292  | 10.701464 |
| H  | 7.300658  | 2.690570  | 11.212303 |
| H  | 8.374738  | 1.263201  | 11.187912 |
| H  | 7.892604  | 2.033852  | 9.661673  |
| C  | 10.153166 | 7.135089  | 11.422911 |
| H  | 10.343126 | 6.683848  | 12.414071 |
| H  | 9.604349  | 8.074254  | 11.573082 |
| H  | 11.108325 | 7.374171  | 10.950645 |
| C  | 7.994805  | 6.031180  | 11.054604 |
| H  | 7.434785  | 5.418429  | 10.340558 |
| H  | 7.496025  | 7.007720  | 11.140570 |
| H  | 7.957720  | 5.551512  | 12.048057 |
| C  | 13.553990 | 5.254953  | 6.293957  |
| H  | 14.007088 | 5.376935  | 7.269685  |
| C  | 13.697276 | 4.113893  | 5.453268  |
| H  | 14.269490 | 3.219555  | 5.675280  |
| C  | 12.970679 | 4.364444  | 4.244254  |
| H  | 12.887747 | 3.692653  | 3.397148  |
| C  | 12.383769 | 5.654456  | 4.353415  |
| H  | 11.767881 | 6.135773  | 3.600885  |
| C  | 12.749143 | 6.212847  | 5.610312  |
| H  | 12.471913 | 7.197925  | 5.969104  |
| C  | 10.304750 | 2.034809  | 8.214842  |
| C  | 11.429252 | 1.297738  | 8.639728  |
| C  | 11.452958 | -0.072440 | 8.375680  |
| H  | 12.324509 | -0.650032 | 8.688558  |
| C  | 10.398124 | -0.722836 | 7.721701  |
| C  | 9.298308  | 0.042391  | 7.327591  |
| H  | 8.470499  | -0.442477 | 6.806611  |
| C  | 9.222909  | 1.421121  | 7.561753  |
| C  | 12.583392 | 1.955849  | 9.350736  |
| H  | 12.266944 | 2.396691  | 10.307071 |
| H  | 13.016439 | 2.764576  | 8.745227  |
| H  | 13.373284 | 1.227031  | 9.562514  |
| C  | 10.443003 | -2.208701 | 7.471417  |
| H  | 9.864592  | -2.483714 | 6.581588  |

|   |           |           |           |
|---|-----------|-----------|-----------|
| H | 10.017469 | -2.759435 | 8.323729  |
| H | 11.472630 | -2.561183 | 7.336768  |
| C | 8.015995  | 2.181884  | 7.069073  |
| H | 7.088305  | 1.667095  | 7.352893  |
| H | 8.019498  | 2.241916  | 5.972003  |
| H | 7.972270  | 3.206468  | 7.452973  |
| C | 11.049824 | 6.938272  | 8.258664  |
| C | 12.306498 | 7.392417  | 8.695007  |
| C | 12.674832 | 8.709435  | 8.385547  |
| H | 13.653934 | 9.067428  | 8.708776  |
| C | 11.832079 | 9.572120  | 7.681052  |
| C | 10.576985 | 9.087144  | 7.288205  |
| H | 9.895069  | 9.747137  | 6.748694  |
| C | 10.156216 | 7.785418  | 7.573312  |
| C | 13.257453 | 6.540518  | 9.502874  |
| H | 13.244595 | 6.834492  | 10.562984 |
| H | 14.290483 | 6.680163  | 9.160119  |
| H | 13.014025 | 5.474360  | 9.454872  |
| C | 12.244953 | 10.986519 | 7.360580  |
| H | 12.261651 | 11.158328 | 6.275411  |
| H | 13.240968 | 11.215747 | 7.755177  |
| H | 11.535544 | 11.708399 | 7.788168  |
| C | 8.767972  | 7.344933  | 7.188755  |
| H | 8.347420  | 8.008644  | 6.425229  |
| H | 8.101327  | 7.378999  | 8.063258  |
| H | 8.746327  | 6.320918  | 6.801605  |
| C | 10.831368 | 4.464784  | 7.788650  |
| N | 10.257750 | 3.445567  | 8.530041  |
| N | 10.636500 | 5.590677  | 8.575963  |
| N | 9.339386  | 3.092459  | 10.781646 |
| N | 9.359106  | 6.246184  | 10.572851 |
| O | 11.383353 | 1.498406  | 5.162525  |
| O | 8.931675  | 4.623809  | 4.681835  |

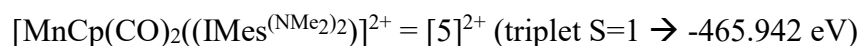

Note : both triplet (S=1 ; here) and BS (Ms=0 ; below) states have been geometry-optimized. They are quasi isoenergetic, meaning that both spin sources (Mn and NHC backbone) are isolated from one another (i.e. do not communicate with one another, magnetically speaking).

|    |           |          |           |
|----|-----------|----------|-----------|
| Mn | 11.604509 | 4.387624 | 6.040636  |
| C  | 10.039690 | 4.009047 | 5.204109  |
| C  | 11.323487 | 6.097462 | 5.402653  |
| C  | 9.771418  | 3.832382 | 9.860965  |
| C  | 9.860357  | 5.254553 | 9.823010  |
| C  | 9.652823  | 3.398921 | 12.282977 |
| H  | 10.254180 | 4.309562 | 12.338073 |
| H  | 10.222890 | 2.571998 | 12.731522 |
| H  | 8.728211  | 3.525880 | 12.861909 |
| C  | 8.696012  | 1.748056 | 10.721154 |
| H  | 7.932037  | 1.661573 | 11.505930 |
| H  | 9.406314  | 0.916112 | 10.834087 |
| H  | 8.205198  | 1.683337 | 9.747981  |
| C  | 9.938085  | 7.462652 | 10.997694 |
| H  | 9.849790  | 7.636460 | 12.079108 |
| H  | 9.399990  | 8.264415 | 10.471298 |
| H  | 10.993908 | 7.492259 | 10.721332 |

|   |           |           |           |
|---|-----------|-----------|-----------|
| C | 8.064705  | 5.908906  | 11.376123 |
| H | 7.608882  | 4.979764  | 11.025736 |
| H | 7.392593  | 6.744975  | 11.132391 |
| H | 8.185613  | 5.879047  | 12.467300 |
| C | 13.495948 | 3.489520  | 6.619885  |
| H | 13.841790 | 3.366103  | 7.639252  |
| C | 12.758826 | 2.526784  | 5.859105  |
| H | 12.416098 | 1.556679  | 6.206237  |
| C | 12.568150 | 3.055474  | 4.551583  |
| H | 12.047702 | 2.564510  | 3.735227  |
| C | 13.174778 | 4.336824  | 4.496671  |
| H | 13.206083 | 4.988469  | 3.629392  |
| C | 13.753664 | 4.610235  | 5.779400  |
| H | 14.312142 | 5.502392  | 6.041964  |
| C | 10.526104 | 1.980154  | 8.322172  |
| C | 11.672976 | 1.358449  | 8.858555  |
| C | 11.913379 | 0.025984  | 8.509390  |
| H | 12.803978 | -0.464137 | 8.906280  |
| C | 11.053867 | -0.696367 | 7.668601  |
| C | 9.913115  | -0.045905 | 7.186532  |
| H | 9.217956  | -0.594164 | 6.548156  |
| C | 9.612381  | 1.284010  | 7.509839  |
| C | 12.621039 | 2.053856  | 9.805932  |
| H | 12.319214 | 1.893665  | 10.851968 |
| H | 12.670129 | 3.137673  | 9.645823  |
| H | 13.633659 | 1.645231  | 9.710387  |
| C | 11.328526 | -2.138561 | 7.334005  |
| H | 10.876013 | -2.425701 | 6.378217  |
| H | 10.903945 | -2.796520 | 8.106917  |
| H | 12.404009 | -2.345972 | 7.288941  |
| C | 8.297828  | 1.862525  | 7.046964  |
| H | 8.140785  | 1.684267  | 5.977089  |
| H | 8.209298  | 2.937970  | 7.228225  |
| H | 7.464113  | 1.365868  | 7.565607  |
| C | 10.744025 | 6.916199  | 8.143533  |
| C | 12.030002 | 7.475190  | 8.286082  |
| C | 12.215394 | 8.790318  | 7.848634  |
| H | 13.204524 | 9.239599  | 7.948525  |
| C | 11.172750 | 9.549801  | 7.301971  |
| C | 9.907412  | 8.953337  | 7.194927  |
| H | 9.084964  | 9.526366  | 6.764113  |
| C | 9.661701  | 7.641017  | 7.605006  |
| C | 13.168020 | 6.731272  | 8.939971  |
| H | 13.058523 | 6.705827  | 10.035506 |
| H | 14.122832 | 7.224871  | 8.729609  |
| H | 13.235314 | 5.690843  | 8.601284  |
| C | 11.403515 | 10.955034 | 6.817424  |
| H | 11.488149 | 10.971305 | 5.720472  |
| H | 12.325802 | 11.380406 | 7.227560  |
| H | 10.566616 | 11.612600 | 7.083010  |
| C | 8.287228  | 7.041918  | 7.440495  |
| H | 7.663661  | 7.680658  | 6.806485  |
| H | 7.766760  | 6.933930  | 8.403700  |
| H | 8.324685  | 6.046027  | 6.978330  |
| C | 10.761254 | 4.431371  | 7.877661  |
| N | 10.287951 | 3.379524  | 8.642818  |

|   |           |          |           |
|---|-----------|----------|-----------|
| N | 10.506738 | 5.565198 | 8.622472  |
| N | 9.350235  | 3.052634 | 10.887266 |
| N | 9.356241  | 6.143676 | 10.714565 |
| O | 9.073459  | 3.806826 | 4.606108  |
| O | 11.202265 | 7.093905 | 4.840113  |

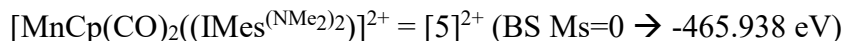

|    |           |           |           |
|----|-----------|-----------|-----------|
| Mn | 11.592669 | 4.377005  | 6.014325  |
| C  | 9.967270  | 4.294387  | 5.219171  |
| C  | 11.547074 | 6.134582  | 5.507733  |
| C  | 9.773650  | 3.820815  | 9.837024  |
| C  | 9.822939  | 5.251934  | 9.786210  |
| C  | 9.597665  | 3.408188  | 12.260265 |
| H  | 10.172010 | 4.335254  | 12.325928 |
| H  | 10.180450 | 2.599438  | 12.725156 |
| H  | 8.655791  | 3.509232  | 12.815133 |
| C  | 8.742530  | 1.712058  | 10.689219 |
| H  | 7.977646  | 1.599235  | 11.469374 |
| H  | 9.485013  | 0.909952  | 10.810104 |
| H  | 8.261163  | 1.625800  | 9.713055  |
| C  | 9.820857  | 7.474105  | 10.937252 |
| H  | 9.699527  | 7.664376  | 12.012419 |
| H  | 9.264630  | 8.243446  | 10.382135 |
| H  | 10.880897 | 7.537798  | 10.685160 |
| C  | 8.003138  | 5.861961  | 11.329794 |
| H  | 7.572500  | 4.919368  | 10.984214 |
| H  | 7.313128  | 6.678861  | 11.072147 |
| H  | 8.117665  | 5.847084  | 12.421511 |
| C  | 13.436700 | 3.284679  | 6.450973  |
| H  | 13.862872 | 3.144082  | 7.437679  |
| C  | 12.558109 | 2.385792  | 5.778775  |
| H  | 12.177995 | 1.445746  | 6.165683  |
| C  | 12.279192 | 2.925418  | 4.491909  |
| H  | 11.644260 | 2.473658  | 3.736226  |
| C  | 12.992004 | 4.146949  | 4.353050  |
| H  | 13.000784 | 4.784681  | 3.475348  |
| C  | 13.709938 | 4.375560  | 5.571346  |
| H  | 14.370497 | 5.213671  | 5.767743  |
| C  | 10.600482 | 1.976379  | 8.344525  |
| C  | 11.744954 | 1.384245  | 8.919370  |
| C  | 12.004377 | 0.045322  | 8.615346  |
| H  | 12.893541 | -0.422840 | 9.040733  |
| C  | 11.164627 | -0.712199 | 7.784200  |
| C  | 10.032512 | -0.085548 | 7.253774  |
| H  | 9.357833  | -0.658411 | 6.615084  |
| C  | 9.717289  | 1.253240  | 7.524477  |
| C  | 12.671912 | 2.127894  | 9.850326  |
| H  | 12.308328 | 2.091326  | 10.888386 |
| H  | 12.784188 | 3.186038  | 9.582772  |
| H  | 13.666483 | 1.668004  | 9.852544  |
| C  | 11.457528 | -2.162480 | 7.505803  |
| H  | 10.954394 | -2.510993 | 6.597253  |
| H  | 11.104824 | -2.789228 | 8.338400  |
| H  | 12.533946 | -2.343721 | 7.401286  |
| C  | 8.430312  | 1.819891  | 6.977661  |
| H  | 8.381423  | 1.709719  | 5.887296  |



|   |           |           |           |
|---|-----------|-----------|-----------|
| H | 8.288146  | 2.878501  | 7.214899  |
| H | 7.569609  | 1.265693  | 7.379324  |
| C | 10.711204 | 6.925607  | 8.135375  |
| C | 11.990701 | 7.486563  | 8.325562  |
| C | 12.180379 | 8.811220  | 7.926442  |
| H | 13.162862 | 9.263936  | 8.067305  |
| C | 11.150796 | 9.575110  | 7.357907  |
| C | 9.894542  | 8.974700  | 7.198507  |
| H | 9.082677  | 9.551708  | 6.753172  |
| C | 9.640645  | 7.654695  | 7.582556  |
| C | 13.118586 | 6.716408  | 8.965864  |
| H | 12.890855 | 6.436471  | 10.005946 |
| H | 14.033359 | 7.317573  | 8.984447  |
| H | 13.334783 | 5.785134  | 8.425483  |
| C | 11.394225 | 10.988326 | 6.904056  |
| H | 11.657733 | 11.003099 | 5.835618  |
| H | 12.221624 | 11.453237 | 7.451774  |
| H | 10.499697 | 11.610548 | 7.024526  |
| C | 8.265307  | 7.065416  | 7.391254  |
| H | 7.688537  | 7.662472  | 6.676999  |
| H | 7.693404  | 7.050713  | 8.331679  |
| H | 8.300874  | 6.035310  | 7.014488  |
| C | 10.783797 | 4.433003  | 7.862694  |
| N | 10.331956 | 3.374451  | 8.642132  |
| N | 10.471989 | 5.568893  | 8.595991  |
| N | 9.341374  | 3.043812  | 10.858691 |
| N | 9.292186  | 6.127760  | 10.672747 |
| O | 8.947272  | 4.263932  | 4.678297  |
| O | 11.590179 | 7.163767  | 4.988979  |
